# Supplementary material for: Perineuronal nets support astrocytic ion and glutamate homeostasis at tripartite synapses
Source: Research Square preprint supplement (doi:10.21203/rs.3.rs-2501039/v1), 2023-02-02
Supplement: Supplementary file 1 [file cefe0a4f35b3161f7a519bd2.xlsx]

## Sheet: Sheet1
Figure	Statistical test			Multiple comparision test			Significant?	Summary	95% Cl of difference between group means			Normality test
	Test	Test statistic	P value	Test	Comparisions	Adjusted P value			Mean difference	LCL	UCL
Figure 1b pearson GFP WFA	One way ANOVA	F = 242.128	3.830X10-12	Tukey's	Kir4.1+WFA Vs. GFP+Kir4.1	0	Yes	****	-0.66212	-0.75062	-0.57363	Shapiro-Wilk: Can't reject normality in all groups
					GFP+WFA Vs. GFP+Kir4.1	0	Yes	****	-0.63563	-0.72413	-0.54714
					GFP+WFA Vs. Kir4.1+WFA	0.72205	No	ns	0.02649	-0.062	0.11498
Figure 1d kir in holes bar	N/A	N/A	N/A	N/A	N/A	N/A	N/A	N/A	N/A	N/A	N/A	Shapiro-Wilk: Can't reject normality in all groups
Figure 1f Glt1 bar	N/A	N/A	N/A	N/A	N/A	N/A	N/A	N/A	N/A	N/A	N/A	Shapiro-Wilk: Can't reject normality in all groups
Fig 1j GAT3	N/A	N/A	N/A	N/A	N/A	N/A	N/A	N/A	N/A	N/A	N/A	Shapiro-Wilk: Can't reject normality in all groups
Fig 1h GAT1	N/A	N/A	N/A	N/A	N/A	N/A	N/A	N/A	N/A	N/A	N/A	Shapiro-Wilk: +AldheGFP can't reject normality, +GAT1 reject normality, +AldheGFP+GAT1 can't reject normality, +Astrocyte can't reject normality, -Astrocyte can't reject normality
Fig 2 b	N/A	N/A	N/A	N/A	N/A	N/A	N/A	N/A	N/A	N/A	N/A	Shapiro-Wilk: Can't reject normality in all groups
Fig 2d	N/A	N/A	N/A	N/A	N/A	N/A	N/A	N/A	N/A	N/A	N/A	Shapiro-Wilk: Can't reject normality in all groups
Fig 2f	N/A	N/A	N/A	N/A	N/A	N/A	N/A	N/A	N/A	N/A	N/A	Shapiro-Wilk: Can't reject normality in all groups
Fig 2h	N/A	N/A	N/A	N/A	N/A	N/A	N/A	N/A	N/A	N/A	N/A	Shapiro-Wilk: Can't reject normality in all groups
Fig 2j	N/A	N/A	N/A	N/A	N/A	N/A	N/A	N/A	N/A	N/A	N/A	Shapiro-Wilk: Can't reject normality in all groups
Fig. 3d NeuN+	Two tailed, unpaired t test	t = -4.30204 (equal variance assumed)	0.00508				Yes	**	-0.22432	-0.3519	-0.09673	Shapiro-Wilk: Can't reject normality in all groups
		t = -5.66339 (equal variance not assumed: Welch correction)	0.00387				Yes	**
Fig. 3d PV+	Two tailed, unpaired t test	t = -3.45368 (equal variance assumed)	0.00111				Yes	**	-11.3896	-18.0071	-4.77204	Shapiro-Wilk: Can't reject normality in all groups
		t = -3.64815 (equal variance not assumed: Welch correction)	0.000663692				Yes	***
Fig. 3f Mean	One way ANOVA (WFA Area)	F = 43.23472	1.4576e-09	Tukey's	CA2 Vs. CA1	0	Yes	****	828.071	563.64	1092.5	Shapiro-Wilk: Reject normality
					CA3 Vs. CA2	0.98645	No	ns	16.8747	-247.556	281.305	Shapiro-Wilk: Reject normality
					CA3 Vs. CA2	0	Yes	****	-811.196	-1056.01	-566.381	Shapiro-Wilk: Can't reject normality
Fig. 3f Mean	One way ANOVA (AldheGFP Area)	F =1.38761	0.26524	Tukey's	CA2 Vs. CA1	0.77323	No	ns	-114.785	-527.115	297.545	Shapiro-Wilk: Can't reject normality in all groups
					CA3 Vs. CA1	0.24576	No	ns	-273.948	-686.278	138.382
					CA3 Vs. CA2	0.56543	No	ns	-159.163	-540.907	222.58
Fig. 3g Area	one way ANOVA	F = 1.70283	0.20186	Tukey's	CA2 Vs. CA1	0.61282	No	ns	-0.09943	-0.35887	0.16001	Shapiro-Wilk: Can't reject normality in all groups
					CA3 Vs. CA1	0.175	No	ns	-0.19266	-0.4521	0.06677
					CA3 Vs. CA2	0.63435	No	ns	-0.09323	-0.34575	0.15928
Fig. 3h	one way ANOVA	F = 1.54441	0.22941	Tukey's	CA2 Vs. CA1	0.27048	No	ns	-0.183	-0.4686	0.1026	Shapiro-Wilk: Can't reject normality
					CA3 Vs. CA1	0.95628	No	ns	-0.03252	-0.31338	0.24834	Shapiro-Wilk: Reject normality
					CA3 Vs. CA2	0.33906	No	ns	0.15048	-0.1088	0.40976	Shapiro-Wilk: Can't reject normality
Fig 4b Flu intensity	One way ANOVA	F=45.81116	2.178e-23	Tukey's	ChABC 0.4 Vs. Sham	0	Yes	****	-809.692	-1004.1	-615.283	Shapiro-Wilk: Can't reject normality
					ChABC 0.8 Vs. Sham	3.15445e-09	Yes	****	-906.124	-1100.53	-711.715	Shapiro-Wilk: Reject normality
					ChABC 1.2 Vs. Sham	3.09124e-09	Yes	****	-897.963	-1092.37	-703.554	Shapiro-Wilk: Can't reject normality
					ChABC 1.6 Vs. Sham	2.95825e-09	Yes	****	-881.134	-1075.54	-686.725	Shapiro-Wilk: Can't reject normality
					ChABC 2.0 Vs. Sham	2.88224e-09	Yes	****	-871.703	-1066.11	-677.294	Shapiro-Wilk: Can't reject normality
					ChABC 2.4 Vs. Sham	0	Yes	****	-848.535	-1042.94	-654.126	Shapiro-Wilk: Can't reject normality
					ChABC 2.8 Vs. Sham	0	Yes	****	-850.541	-1044.95	-656.132	Shapiro-Wilk: Can't reject normality
					ChABC 3.2 Vs. Sham	0	Yes	****	-851.021	-1045.43	-656.612	Shapiro-Wilk: Can't reject normality
Fig 4c PNN holes	Two tailed, unpaired t test	t = -3.33781 (equal variance assumed)	0.00662				Yes	**	-0.62329	-1.03429	-0.21229	Shapiro-Wilk: Can't reject normality in all groups
		t = -3.44582 (equal variance not assumed: Welch correction)	0.00586				Yes	**
Fig 4e top	Two tailed, unpaired t test	t = -1.67525 (equal variance assumed)	0.10189				No	ns	-12.5312	-27.6613	2.59894	Shapiro-Wilk: Can't reject normality in all groups
		t = -1.6721 (equal variance not assumed: Welch correction)	0.10263				No	ns
Fig 4e middle	Two tailed, unpaired t test	t = -2.67001 (equal variance assumed)	0.01615				Yes	*	-0.09448	-0.16913	-0.01982	Sham PNN+: Shapiro-Wilk: Reject normality
		t = -2.75441 (equal variance not assumed: Welch correction)	0.01552				Yes	*				ChABC PNN+: Shapiro-Wilk: Can't reject normality
Fig 4e bottom	Two tailed, unpaired t test	t = 0.0526 (equal variance assumed)	0.9586				No	ns	0.00206	-0.07996	0.08408	Shapiro-Wilk: Can't reject normality in all groups
		t = 0.05279 (equal variance not assumed: Welch correction)	0.95845				No	ns
Fig 4f bottom	Two tailed, unpaired t test	t = -2.36658 (equal variance assumed)	0.03291				Yes	*	-0.07067	-0.13472	-0.00662	PNN intact GFP+WFA: Shapiro-Wilk: Reject normality
		t = -2.36658 (equal variance not assumed: Welch correction)	0.03804				Yes	*				PNN depleted GFP+WFA: Shapiro-Wilk: Can't reject normality
Fig 4g	Two tailed, unpaired t test	t = -0.45607 (equal variance assumed)	0.66216				No	ns	-5.8447	-36.1485	24.4591	Shapiro-Wilk: Can't reject normality in all groups
		t = -0.50273 (equal variance not assumed: Welch correction)	0.63573				No	ns
Fig 4h	Two tailed, unpaired t test	t = -0.563 (equal variance assumed)	0.57881				No	ns	-23.2099	-108.33	61.9101	Combined non digested group: Shapiro-Wilk: Can't reject normality
		t = -0.534 (equal variance not assumed: Welch correction)	0.60147				No	ns				Combined digested group: Shapiro-Wilk: Reject normality
Fig 4j vGlut1	Two tailed, unpaired t test (Pericellular synapses PNN+ Sham vs Pericellular synapses PNN+ ChABC)	t = -0.56795 (equal variance assumed)	0.59462				No	ns	-0.06918	-0.38232	0.24395	Shapiro-Wilk: Can't reject normality in all groups
		t = -0.50345 (equal variance not assumed: Welch correction)	0.65465				No	ns
Fig 4j vGlut1	Two tailed, unpaired t test ( Pericellular synapses PNN- Sham vs Pericellular synapses PNN- ChABC)	t = -1.31246 (equal variance assumed)	0.23076				No	ns	-0.17918	-0.502	0.14364	Pericellular synapses PNN- Sham: Shapiro-Wilk: Can't reject normality
		t = -1.23581 (equal variance not assumed: Welch correction)	0.27484				No	ns				Pericellular synapses PNN- ChABC: Shapiro-Wilk: Reject normality
Fig 4j vGlut1+GFP	Two tailed, unpaired t test (synapses with glial contact PNN+ Sham vs. synapses with glial contact PNN+ ChABC)	t = -0.52156 (equal variance assumed)	0.62425				No	ns	-0.04212	-0.24969	0.16546	Shapiro-Wilk: Can't reject normality in all groups
		t = -0.56283 (equal variance not assumed: Welch correction)	0.59824				No	ns
Fig 4j vGlut1+GFP	Two tailed, unpaired t test (synapses with glial contact PNN- Sham vs. synapses with glial contact PNN- ChABC)	t = -1.23538 (equal variance assumed)	0.26286				No	ns	-0.0751	-0.22386	0.07365	Shapiro-Wilk: Can't reject normality in all groups
		t = -0.95006 (equal variance not assumed: Welch correction)	0.43451				No	ns
Fig 4l vGAT	Two tailed, unpaired t test ( PNN+ Sham, contra, ND vs. PNN+ Digested)	t = 0.60863 (equal variance assumed)	0.55513				No	ns	0.01684	-0.04405	0.07773	Shapiro-Wilk: Can't reject normality in all groups
		t = 0.5809 (equal variance not assumed: Welch correction)	0.57857				No	ns
Fig 4l vGAT	Two tailed, unpaired t test (PNN- Sham ND or contra vs. PNN- Digested)	t = -0.74806 (equal variance assumed)	0.47011				No	ns	-0.03297	-0.13	0.06405	Shapiro-Wilk: Can't reject normality in all groups
		t = -0.70644 (equal variance not assumed: Welch correction)	0.50398				No	ns
Fig 4l vGAT+GFP	Two tailed, unpaired t test (PNN+ Sham, contra, ND vs. PNN+ Digested)	t = 0.12006 (equal variance assumed)	0.9066				No	ns	0.00552	-0.09568	0.10672	Shapiro-Wilk: Can't reject normality in all groups
		t = 0.12579 (equal variance not assumed: Welch correction)	0.90255				No	ns
Fig 4l vGAT+GFP	Two tailed, unpaired t test (PNN- Sham ND or contra vs. PNN- Digested)	t = -1.52881 (equal variance assumed)	0.15454				No	ns	-0.05034	-0.1228	0.02213	Shapiro-Wilk: Can't reject normality in all groups
		t = -1.57536 (equal variance not assumed: Welch correction)	0.14458				No	ns
Fig 5c WFA area	Two tailed, unpaired t test	t = 7.71619 (equal variance assumed)	3.8631e-09				Yes	****	13.0517	9.62123	16.4821	Shapiro-Wilk: PNN+/GFP-: Can't reject normality
		t = 6.95743 (equal variance not assumed: Welch correction)	2.58877e-06				Yes	****				Shapiro-Wilk: PNN-/GFP+: Reject normality
Fig 5e s100b	Two tailed, unpaired t test	t = -2.07436 (equal variance assumed)	0.04506				Yes	*	-0.06979	-0.13796	-0.00162	Shapiro-Wilk: Can't reject normality in all groups
		t = -2.08658 (equal variance not assumed: Welch correction)	0.04422				Yes	*
Fig 5g Glt1	Two tailed, unpaired t test	t = -3.11006 (equal variance assumed)	0.00328				Yes	**	-0.06677	-0.11003	-0.0235	Shapiro-Wilk: Can't reject normality in all groups
		t = -3.01411 (equal variance not assumed: Welch correction)	0.00475				Yes	**
Fig 5i Kir	Two tailed, unpaired t test	t = -3.51477 (equal variance assumed)	0.00116				Yes	**	-0.10289	-0.16216	-0.04363	Shapiro-Wilk: Can't reject normality in all groups
		t = -3.37289 (equal variance not assumed: Welch correction)	0.00214				Yes	**
Fig 5k vGlut1	Two tailed, unpaired t test	t = -0.39996 (equal variance assumed)	0.69028				No	ns	-0.01141	-0.06818	0.04537	Shapiro-Wilk: Can't reject normality in all groups
		t = -0.39996 (equal variance not assumed: Welch correction)	0.69028				No	ns
Fig 5l s100b	Two tailed, unpaired t test	t = -0.21745 (equal variance assumed)	0.82842				No	ns	-0.00659	-0.0669	0.05372	Shapiro-Wilk: vGlut1+s100b/cellperimeter Ctrl: Can't reject normality
		t = -0.21745 (equal variance not assumed: Welch correction)	0.82843				No	ns				Shapiro-Wilk: vGlut1+s100b/cellperimeter KO: Reject normality
Fig 5n vGAT	Two tailed, unpaired t test	t = -0.46952 (equal variance assumed)	0.64001				No	ns	-0.01021	-0.05348	0.03307	Shapiro-Wilk: Can't reject normality in all groups
		t = -0.46952 (equal variance not assumed: Welch correction)	0.64002				No	ns
Fig 5o s100b	Two tailed, unpaired t test	t = 0.30669 (equal variance assumed)	0.75989				No	ns	0.00453	-0.02489	0.03396	Shapiro-Wilk: Can't reject normality in all groups
		t = 0.30669 (equal variance not assumed: Welch correction)	0.7599				No	ns
fig 6b	Two tailed, unpaired t test	t = -1.97084 (equal variance assumed)	0.05948				No	ns	-10	-20.4297	0.4297	Shapiro-Wilk: Reject normality in all groups
		t = -2.54867 (equal variance not assumed: Welch correction)	0.01771				Yes	*
fig 6c	Two tailed, unpaired t test	t = -1.82888 (equal variance assumed)	0.07809				No	ns	-6.6578	-14.1148	0.79918	Shapiro-Wilk: Reject normality in all groups
		t = -2.85638 (equal variance not assumed: Welch correction)	0.00821				Yes	**
Fig 6f GLU peak current	Two way ANOVA	F= 4.07743	2.27246e-05	Tukey's	ChABC 10 Vs. Control 10	1	No	ns	52.2272	-5036.31	5140.77	Kolmogorov_Smirnov: Can't reject normality in all
					ChABC 20 Vs. Control 20	1	No	ns	815.428	-4273.11	5903.97
					ChABC 40 Vs. Control 40	0.90926	No	ns	2879.07	-2209.47	7967.61
					ChABC 60 Vs. Control 60	0.11063	No	ns	4717.23	-371.304	9805.77
					ChABC 80 Vs. Control 80	0.00458	Yes	**	6011.67	923.13	11100.2
					ChABC 100 Vs. Control 100	0.000448372	Yes	***	6825.07	1692.47	11957.7
					ChABC 120 Vs. Control 120	0.000202928	Yes	***	7064.97	1932.37	12197.6
					ChABC 140 Vs. Control 140	1.36046e-05	Yes	****	7830.13	2697.53	12962.7
					ChABC 160 Vs. Control 160	1.86544e-07	Yes	****	8942.17	3809.57	14074.8
					ChABC 180 Vs. Control 180	3.68209e-07	Yes	****	8767.98	3635.38	13900.6
					ChABC 200 Vs. Control 200	1.89402e-08	Yes	****	9642.61	4510.01	14775.2
fig 6g GLU area	Two way ANOVA	F= 5.41424	1.50092e-07	Tukey's	ChABC 10 Vs. Control 10	1	No	ns	150.768	-4995.36	5296.9	Kolmogorov_Smirnov: Reject normality
					ChABC 20 Vs. Control 20	1	No	ns	879.75	-4266.38	6025.88
					ChABC 40 Vs. Control 40	0.91794	No	ns	2879.07	-2267.06	8025.2	Kolmogorov_Smirnov: Can't reject normality in all groups
					ChABC 60 Vs. Control 60	0.1228	No	ns	4717.23	-428.896	9863.37
					ChABC 80 Vs. Control 80	0.00555	Yes	**	6011.67	865.538	11157.8
					ChABC 100 Vs. Control 100	0.000808383	Yes	***	6657.9	1511.77	11804
					ChABC 120 Vs. Control 120	0.000399039	Yes	***	6878.24	1732.11	12024.4
					ChABC 140 Vs. Control 140	6.38242e-06	Yes	****	8052.44	2906.31	13198.6
					ChABC 160 Vs. Control 160	7.18506e-07	Yes	****	8618.29	3472.16	13764.4
					ChABC 180 Vs. Control 180	9.77289e-07	Yes	****	8539.93	3393.8	13686.1
					ChABC 200 Vs. Control 200	1.04545e-07	Yes	****	9112.97	3966.84	14259.1
Fig 6k peak	Two tailed, unpaired t test	t = 0.42282 (equal variance assumed)	0.67619				No	ns	12.2615	-47.5905	72.1136	Shapiro-Wilk: Can't reject normality in all groups
		t = 0.38368 (equal variance not assumed: Welch correction)	0.70713				No	ns
Fig 6l charge transfer	Two tailed, unpaired t test	t = 0.15879 (equal variance assumed)	0.87517				No	ns	3623.11	-43469.6	50715.8	Shapiro-Wilk: Can't reject normality in all groups
		t = 0.14859 (equal variance not assumed: Welch correction)	0.88374				No	ns
Fig 6m Decay slope	Two tailed, unpaired t test	t = -0.22279 (equal variance assumed)	0.82559				No	ns	-0.02075	-0.21298	0.17148	Shapiro-Wilk: Control: Reject normality
		t = -0.20487 (equal variance not assumed: Welch correction)	0.8405				No	ns				Shapiro-Wilk: ChABC: Can't reject normality
Fig 6n Decay time	Two tailed, unpaired t test	t = -1.55261 (equal variance assumed)	0.1336				No	ns	-64.5434	-180.815	51.7277	Shapiro-Wilk: Control: Reject normality
		t = -1.45478 (equal variance not assumed: Welch correction)	0.16498				No	ns				Shapiro-Wilk: ChABC: Can't reject normality
Fig. 7b	Two tailed, unpaired t test	t = -0.47144 (equal variance assumed)	0.64411				No	ns	-2.77778	-15.3365	9.78098	Shapiro-Wilk: Can't reject normality in all groups
		t = -0.48345 (equal variance not assumed: Welch correction)	0.63632				No	ns
Fig. 7c	Two tailed, unpaired t test	t = -2.64751 (equal variance assumed)	0.01828				Yes	*	-2.86391	-5.16958	-0.55824	Shapiro-Wilk: Can't reject normality in all groups
		t = -2.57721 (equal variance not assumed: Welch correction)	0.02481				Yes	*
Fig. 7f K peak	Two way ANOVA	F= 2.08073	0.0474	Tukey's	ChABC 3000 Vs. Control 3000	0.04939	Yes	*	17.4317	0.02038	34.843	Kolmogorov_Smirnov: Can't reject normality
					ChABC 2500 Vs. Control 2500	0.01313	Yes	*	19.4648	2.0535	36.8762
					ChABC 2000 Vs. Control 2000	0.00109	Yes	**	22.7271	5.31573	40.1384
					ChABC 1500 Vs. Control 1500	0.00585	Yes	**	20.5861	3.17477	37.9975
					ChABC 1000 Vs. Control 1000	0.01561	Yes	*	19.2144	1.80312	36.6258
					ChABC 500 Vs. Control 500	0.40867	No	ns	13.0108	-4.40055	30.4221
					ChABC 200 Vs. Control 200	0.99957	No	ns	5.29283	-12.1185	22.7042
					ChABC 100 Vs. Control 100	1	No	ns	3.43699	-13.9743	20.8483
Fig. 7g K area	Two way ANOVA	F= 1.73044	0.1046	Tukey's	ChABC 3000 Vs. Control 3000	0.1048	No	ns	45937.2	-3726.24	95600.5	Kolmogorov_Smirnov: Can't reject normality
					ChABC 2500 Vs. Control 2500	0.04276	Yes	*	50399.3	735.957	100063
					ChABC 2000 Vs. Control 2000	0.02335	Yes	*	53114.6	3451.25	102778
					ChABC 1500 Vs. Control 1500	0.04276	Yes	*	50399.3	735.957	100063
					ChABC 1000 Vs. Control 1000	0.15779	No	ns	43642.9	-6020.51	93306.3
					ChABC 500 Vs. Control 500	0.85301	No	ns	27728	-21935.4	77391.4
					ChABC 200 Vs. Control 200	1	No	ns	9856.17	-39807.2	59519.6
					ChABC 100 Vs. Control 100	1	No	ns	6805.08	-42858.3	56468.5
Fig. 7i	Two tailed, unpaired t test	t = 6.23958 (equal variance assumed)	2.16449e-05				Yes	****	12092.5	7935.84	16249.2	Shapiro-Wilk: Can't reject normality in all groups
		t = 6.23958 (equal variance not assumed: Welch correction)	0.000428263				Yes	***
Fig. 7j	Two tailed, unpaired t test	t = 0.05397 (equal variance assumed)	0.95772				No	ns	154.531	-5986.51	6295.57	Shapiro-Wilk: Can't reject normality in all groups
		t = 0.05397 (equal variance not assumed: Welch correction)	0.95783				No	ns
Fig 7k	Two tailed, unpaired t test	t = -0.19969 (equal variance assumed)	0.8446				No	ns	-388.212	-4557.92	3781.5	Shapiro-Wilk: Can't reject normality in all groups
		t = -0.19969 (equal variance not assumed: Welch correction)	0.8446				No	ns
Fig s1C hippo	One way ANOVA	F=25.16832	5.08894e-05	Tukey's	AldheGFP/Kir4.1 Vs. Kir4.1/WFA	0.000848369	Yes	***	-0.12822	-0.19677	-0.05966	Shapiro-Wilk: Can't reject normality in all groups
					AldheGFP/Kir4.1 Vs. AldheGFP/WFA	0.18875	No	ns	0.04813	-0.02042	0.11668
					Kir4.1/WFA Vs. AldheGFP/WFA	4.79132e-05	Yes	****	0.17634	0.10779	0.2449
Fig s1d hippo	One way ANOVA	F=18.16807	0.000234129	Tukey's	AldheGFP/Kir4.1 Vs. Kir4.1/WFA	0.000257495	Yes	***	-0.26694	-0.39121	-0.14267	Shapiro-Wilk: Can't reject normality in all groups
					AldheGFP/Kir4.1 Vs. AldheGFP/WFA	0.00199	Yes	**	-0.20888	-0.33315	-0.08461
					Kir4.1/WFA Vs. AldheGFP/WFA	0.45014	No	ns	0.05806	-0.06621	0.18233
Fig s4c ctrl Chabc bars	One way ANOVA	F=189.2677	1.30791e-40	Tukey's	ChABC AldheGFP Sham AldheGFP	3.55801e-08	Yes	****	26.2913	17.3766	35.206	Shapiro-Wilk: Can't reject normality in all groups
					ChABC Glt1 Sham Glt1	4.81508e-08	Yes	****	22.0565	13.1418	30.9712
					ChABC AldheGFP+Glt2 Sham AldheGFP+Glt1	3.30183e-08	Yes	****	27.3229	18.4083	36.2376
					ChABC Occupied Sham Occupied	1.7423e-08	Yes	****	21.129	12.2144	30.0437
					ChABC Empty Sham Empty	1.7423e-08	Yes	****	-21.129	-30.0437	-12.2144
Fig S4e vGlut1 in holes	Two tailed, unpaired t test	t = -1.14256 (equal variance assumed)	0.28271				No	ns	-7.87594	-23.4695	7.71766	Shapiro-Wilk: Can't reject normality in all groups
		t = -1.18131 (equal variance not assumed: Welch correction)	0.26831				No	ns
Fig S4f vGlut1_gfp in holes	Two tailed, unpaired t test	t = -0.91311 (equal variance assumed)	0.38499				No	ns	-7.2977	-25.3772	10.7818	Shapiro-Wilk: Can't reject normality in all groups
		t = -0.95092 (equal variance not assumed: Welch correction)	0.36759				No	ns
Fig S4h vGAT in holes	Two tailed, unpaired t test	t = -1.09986 (equal variance assumed)	0.29717				No	ns	-4.72386	-14.2937	4.84594	Shapiro-Wilk: Can't reject normality in all groups
		t = -0.99261 (equal variance not assumed: Welch correction)	0.36144				No	ns
Fig S4i vGAT_GFP in holes	Two tailed, unpaired t test	t = -1.27571 (equal variance assumed)	0.2309				No	ns	-7.69903	-21.1461	5.74804	Shapiro-Wilk: Sham Total: Reject normality
		t = -1.15814 (equal variance not assumed: Welch correction)	0.29222				No	ns				Shapiro-Wilk: ChABC Total: Can't reject normality
fig s5c	Two tailed, unpaired t test	t = 0.72795 (equal variance assumed)	0.46904				No	ns	0.43793	-0.7616	1.63745	Shapiro-Wilk: Control: Can't reject normality
		t = 0.68142 (equal variance not assumed: Welch correction)	0.49965				No	ns				Shapiro-Wilk: ChABC-treated: Reject normality
Fig s5d	Two tailed, unpaired t test	t = -0.88212 (equal variance assumed)	0.38091				No	ns	-0.4068	-1.32754	0.51394	Shapiro-Wilk: Can't reject normality in all groups
		t = -0.8568 (equal variance not assumed: Welch correction)	0.39685				No	ns
Fig s5e	Two tailed, unpaired t test	t = -2.30939 (equal variance assumed)	0.02416				Yes	*	-11.1712	-20.8348	-1.50761	Shapiro-Wilk: Reject normality in all groups
		t = -1.92608 (equal variance not assumed: Welch correction)	0.06406				No	ns
Fig S6c	Two tailed, unpaired t test	t = 0.50423 (equal variance assumed)	0.62502				No	ns	1091.43	-3731.47	5914.33	Shapiro-Wilk: Can't reject normality in all groups
		t = 0.51889 (equal variance not assumed: Welch correction)	0.61564				No	ns
Fig S6d	Two tailed, unpaired t test	t = -1.04665 (equal variance assumed)	0.3199				No	ns	-2434.8	-7618.06	2748.45	Shapiro-Wilk: AldheGFP area non treated: Reject normality
		t = -1.06272 (equal variance not assumed: Welch correction)	0.31494				No	ns				Shapiro-Wilk: AldheGFP area ChABC treated: Can't reject normality
Fig S6e	Two tailed, unpaired t test	t = 10.1313 (equal variance assumed)	1.41025e-06				Yes	****	6542.35	5103.51	7981.18	Shapiro-Wilk: WFA area non treated: Can't reject normality
		t = 8.43994 (equal variance not assumed: Welch correction)	0.00097969				Yes	***				Shapiro-Wilk: WFA area ChABC treated: Reject normality
